# Supplementary material
Source: publisher figshare collection journal article supplement (https://frontiersin.figshare.com/ndownloader/files/16971557)
Supplement: Supplementary file 1 [file 16971557]

## Sheet: Sheet1
Species	Location	Depth	COI	16S	Reference
Sirsoe ahabi	Monterey Canyon	2893	JN571876	JN571887	Summers et al., 2015
Sirsoe balaenophila (clade-1)	Monterey Canyon/SW Atlantic: natural whale fall, ES-1500, ES3300, SP3300,RJ3300	1491-4204	DQ513297-DQ513300/ JN571831-JN571837/ MH935085-MH935093	DQ513301/ DQ513303-DQ513305/ JN571884/ MH935162-MH935168	Pleijel et al., 2008; Summers et al., 2015; this study
Sirsoe balaenophila (clade-2)	Monterey Canyon	2893	DQ513297/ JN571836	DQ513302/ JN571883	Pleijel et al., 2008; Summers et al., 2015
Sirsoe pirapuan sp. nov. (clade-3)	ES1500/ES3300	1491-3322	MH935094-MH935106	MH935169-MH935178/MH935189	this study
Sirsoe ypupiara sp. nov. (clade-4)	SP3300/RJ3300	3285-2258	MH935107-MH935121	MH935179-MH935188/MH935190	this study
Sirsoe falenothiras	Monterey Canyon	2893	JN571875	JN571886	Summers et al., 2015
Sirsoe ketea	Monterey Canyon	2893	JN571838	JN571885	Summers et al., 2015
Sirsoe sp. A	Guaymas Basin	1565	KP745533	KP745536	Summers et al., 2015
Sirsoe methanicola	Gulf of Mexico	-	DQ513295	DQ442582	Pleijel et al., 2008
Sirsoe sirikos	Monterey Canyon/SW Atlantic: natural whale fall	2893-4204	JN571829/ MH935152	JN571882/ MH935153	Summers et al., 2015; this study
Sirsoe maximiano sp. nov.	Cayman Spreading Center/SW Atlantic: SP1500, SP3300	1508-3358	KJ566956/ MH935148-MH935151	MH935154-MH935157	Plouviez et al., 2015; this study
Sirsoe alphacrucis sp. nov.	SW Atlantic: diapir, SP1500, ES1500	1491-1508	MH935133-MH935140	MH935191-MH935195/MH935205	this study
Sirsoe yokosuka sp. nov.	SW Atlantic: natural whale fall/ES3300/ SP3300	3322-4204	MH935141-MH935144	MH935196-MH935198	this study
Sirsoe besnard sp. nov.	SW Atlantic: RJ3300	3285	MH935147	MH935199	this study
Sirsoe alphadelphini sp. nov.	SW Atlantic: RJ3300	3285	MH935132	MH935203	this study
Sirsoe ungava sp. nov.	SP3300	3358	MH935145	MH935160	this study
Sirsoe alucia sp. nov.	SW Atlantic: diapir	550	MH935122-MH935128	MH935158-MH935159/MH935204	this study
Sirsoe nadir sp. nov.	SW Atlantic: diapir	550	MH935129-MH935131	MH935200-MH935202	this study
Sirsoe sp. 'BioSuOr'	SP3300	3358	MH935146	MH935161	this study
Table 2 - Locality, depth and GenBank accession number of sequences employed in this study
